# Supplementary material
Source: Research Square preprint supplement (doi:10.21203/rs.3.rs-9105614/v1)
Supplement: Supplementary file 1 [file 8d17e9a0dacca2427166cdce.docx]

| DEMOGRAPHIC | ADHD | NO ADHD | P-VALUE | AUTISM | NO AUTISM | P-VALUE |
| --- | --- | --- | --- | --- | --- | --- |
| N (%) | 65 (11) | 528 (89) |  | 16 (2.69) | 574 (97.3) |  |
| Sex (male, N (%)) | 49 (75.4) | 256 (48.5) | **<0.001** | 10 (62.5) | 294 (51.2) | 0.524 |
| Maternal age at birth (mean (SD)) | 32.2 (4.7) | 31.4 (4.3) | 0.745 | 33.1 (5.1) | 32.3 (4.3) | 0.490 |
| Paternal age at birth (mean (AD)) | 34.9 (5.7) | 34.6 (5.2) | 0.747 | 35.4 (6.3) | 34.6 (5.2) | 0.524 |
| Household income 3 month before birth N (%) |  |  | 0.093 |  |  | 0.926 |
| high > 250,000 DKK | 5 (7.7) | 86 (16.3) |  | 2 (12.5) | 89 (15.5) |  |
| medium > 150,000-250,000 DKK | 33 (50.8) | 274 (52.3) |  | 9 (56.2) | 298 (52.0) |  |
| low 150,000 DKK | 27 (41.5) | 164 (31.3) |  | 5 (31.2) | 186 (32.5) |  |
| Maternal level of education N (%) |  |  | **0.006** |  |  | 0.296 |
| university | 9 (13.8) | 160 (30.3) |  | 2 (12.5) | 166 (28.9) |  |
| tradesman certificate | 46 (70.8) | 328 (62.1) |  | 13 (81.2) | 359 (62.5) |  |
| elementary | 10 (15.4) | 40 (7.6) |  | 1 (6.2) | 49 (8.5) |  |
| Paternal level of education N (%) |  |  | 0.719 |  |  | 0.218 |
| university | 15 (23.1) | 148 (29.0) |  | 1 (6.7) | 162 (28.9) |  |
| tradesman certificate | 44 (67.7) | 310 (60.8) |  | 11 (73.3) | 343 (61.3) |  |
| elementary | 6 (9.2) | 52 (10.2) |  | 3 (20.0) | 55 (9.8) |  |
| Parents seperated (at any time up to age 10) N (%) | 16 (24.6) | 93 (17.8) | 0.371 | 4 (25.0) | 105 (18.5) | 0.785 |
| PREGNANCY AND BIRTH |  |  |  |  |  |  |
| Gestational age (median [IQR]) | 40 [39.1, 41.1] | 40.1 [39.1, 41] | 0.745 | 40.3 [39.3, 41.2] | 40.1 [39.1, 41] | 0.576 |
| Delivery N (%) |  |  | 0.750 |  |  | 0.320 |
| acute sectio | 8 (12.3) | 62 (11.8) |  | 1 (6.2) | 69 (12.0) |  |
| planned sectio | 4 (6.2) | 47 (9.0) |  | 0 (0.0) | 51 (8.9) |  |
| vaginal birth | 53 (81.5) | 416 (79.2) |  | 15 (93.8) | 454 (79.1) |  |
| Gestational diabetes N (%) | 2 (3.1) | 12 (2.5) | 1.000 | 1 (6.2) | 14 (2.4) | 0.883 |
| Preeclampsia N (%) | 2 (3.1) | 25 (4.7) | 0.770 | 0 (0.0) | 27 (4.7) | 0.777 |
| Smoking during pregnancy N (%) | 5 (7.7) | 14 (2.7) | 0.071 | 0 (0.0) | 19 (3.3) | 0.983 |

**Table 1:** Baseline characteristics regarding demographic and perinatal factors of the ADHD, no ADHD, autism and no autism groups. The children in no ADHD or no autism group are healthy or have other psychiatric diagnosis except from ADHD or autism, respectively Abbreviations: ADHD: Attention Deficit /Hyperactivity Disorder, N (%): Number (Percentage), SD: Standard Deviation, IQR: Interquartile Range
