# Supplementary material
Source: Research Square preprint supplement (doi:10.21203/rs.3.rs-9105614/v1)
Supplement: Supplementary file 2 [file a203df0127860e447c0f9e6f.docx]

**SUPPLEMENTARY**

***Methods***

**Neurodevelopment measures in first years of life (0-3 years)**

*Motor milestones:* At the clinical visit at 1 week of age, the parents received a registration form based on The Denver Development Index1 and World Health Organization milestones registration2. The parents registered dates of achievement for 13 predefined milestones. From a PCA analysis on milestones ratings, PC1 and PC2 explained 37% and 16% of the variance, respectively. PC1 was primarily driven by the late gross motor milestones ratings (crawling, walking, and standing) and PC2 by the early milestones ratings (smile, laugh, head lift, chest lift and sit with support)3. We titled PC2 the early milestones PC and PC1 the late milestones PC.

*Language at 1 and 2 years:* Parents filled the Danish version of The MacArthur Bates Communicative Developmental Inventory, a validated tool to assess lexical development by a standardized parent reporting system4. The count of active words at 1 and 2 years of age were used in this study, termed as word production. We also use data on the number of words in the longest pronounced sentence at 2 years.

*Cognition at 2.5 years:* Cognitive development was assessed at the scheduled clinical visit at 2.5 years of age with the composite score of the third edition of the Bayley Scales of Infant and Toddler Development. The cognitive scale assesses play skills, information processing, memory and habituation skills, and reasoning abilities5.

*Behavioral and emotional problems at 2.5 years:* We used the Test Observation Form for Ages 2 ̶ 18 (TOF), part of the Achenbach System of Empirically Based Assessment (ASEBA)6, a standardized objective rating form. The scoring was based on video recordings of Bayley Test and was scored by a research assistant who was not part of the cognitive evaluation. A selection of 14 study participants were also assessed by a psychologist with specialty in children and adolescents (JRMJ) demonstrating an intraclass correlation coefficient of 0.95. If video quality was insufficient the child was not scored on the TOF. The rating scale contains 125 items that describe children's behaviour, affect, and test-taking style during the Bayley test session. Examiners rate the child’s behaviour using a 4-point scale: 0 = no occurrence; 1 = very slight or ambiguous occurrence; 2 = definite occurrence with mild to moderate intensity/frequency; 3 = definite occurrence with severe intensity and high frequency. Validation analysis for the Danish version of the TOF is described in the eMethods section of supplementary.

*General development at 3 years:* Parents were asked to fill out The Ages and Stages Questionnaire (ASQ-3)7, The questions are divided into 5 different areas: Communication, problem solving, social-personal skills, gross and fine motor development. Each item was scored 10 for *yes*, 5 for *sometimes*, 0 for *not yet*.

**Psychopathological assessments at age 10**

#### Categorical psychopathology: ADHD and autism

Categorical psychopathology was assessed with the semi-structured clinical diagnostic interview Kiddie-Schedule for Affective Disorders and Schizophrenia for School-Age Children-Present and Lifetime Version (K-SADS-PL)8. Inter-rater reliability on present symptoms was 88.5 %, 95% CI (92.6-93.0)9. Diagnoses were assigned according to the International Classification of Disorders 10th Revision (ICD-10)10. In the current cohort, ICD-10 diagnostic codes of ADHD include DF90.0, DF90.8, and DF98.8, and of autism DF84.0, DF84.5, and DF84.8. ADHD diagnoses were separated in combined presentation, ICD-10 diagnostic codes DF90.0 and DF90.8 and inattention presentation, DF98.8C. Children that received both an ADHD and autism diagnosis were included under each label.

#### Dimensional psychopathology: ADHD and autistic traits

ADHD traits were assessed with the ADHD-RS completed by a parent. This scale is a 26-item questionnaire, where items 1-9 constitute the attention subscale, items 10-18 the hyperactivity/impulsivity subscale, and items 19-26 the oppositional behaviour subscale11. We used the score from 1-18 as the total score. The oppositional behaviour subscale was not used in this study.

Autism traits were assessed with SRS-2, which is a 65-item rating scale for assessing social deficits, restricted interests and repetitive behaviours. Each item is rated on a scale of 0 (never true), 1 (sometimes true), 2 (often true) and 3 (always true)12.We used the total score in this study.

**Polygenic Risk Scores**

To calculate PRSs for ADHD and ASD, we utilized summary statistics from publicly accessible GWAS meta-analyses datasets. These included 38,691 individuals diagnosed with ADHD and 186,843 controls for the ADHD PRS13, and 18,381 ASD cases and 27,969 controls for the ASD PRS14. We employed the PRS-CS software package15. This tool uses a high-dimensional Bayesian regression model to regularize single-nucleotide polymorphism (SNP) effects via a continuous shrinkage prior. The input for PRS-CS included a linkage disequilibrium reference panel based on European samples from the 1000 Genomes Project, containing 1,120,697 autosomal SNPs, as well as imputed genotypes available from the COPSAC2010 cohort. We updated the effect sizes for each SNP using PLINK software16, and the aggregated SNP effects, i.e., the PRS, were scaled to generate the final score used in the analyses.

**Demographic and perinatal factors**

Information regarding demographic and perinatal characteristics was obtained at the first visits to the COPSAC research unit. Demographic factors included sex, maternal age at birth, highest maternal and paternal education (university, tradesman certificate, elementary school), household income at the trimester before birth, parents separated at any time up to age 10, and parity. Perinatal factors included gestational diabetes, pre-eclampsia, maternal smoking during pregnancy, gestational age, and delivery (caesarean section/vaginal birth).

***Results***

**eTable 1:** Results from logistic regression analysis between early life neurodevelopment measures and ADHD diagnosis at age 10. **Abbreviations:** OR: Odds Ratio. CI: Confidence Interval, N: sample size, PC: Principal Component, ASQ: Ages and Stages Questionnaire, TOF: Test Observation Form (Behavioral and emotional problems), Bayley Score (Cognitive functioning).

**eTable 2**: Results from linear regression analyses between early life neurodevelopment measures and ADHD traits (ADHD-RS) at age 10. **Abbreviations:** CI: Confidence Interval, N: sample size, PC: Principal Component, ASQ: Ages and Stages Questionnaire. TOF: Test Observation Form (Behavioural and emotional problems), Bayley Score (Cognitive functioning).

**eTable 3**: Results from logistic regression analysis between early life neurodevelopment measures and autism diagnosis at age 10. **Abbreviations:** OR: Odds Ratio. CI: Confidence Interval, N: sample size, PC: Principal Component, ASQ: Ages and Stages Questionnaire, TOF: Test Observation Form (Behavioural and emotional problems), Bayley Score (Cognitive functioning).

**eTable 4:** Results from linear regression analyses between early life neurodevelopment measures and autistic traits (SRS-2) at age 10. **Abbreviations:** CI: Confidence Interval, N: sample size, PC: Principal Component, ASQ: Ages and Stages Questionnaire. TOF: Test Observation Form (Behavioral and emotional problems), Bayley Score (Cognitive functioning).

**eTable 5**: Associations between ADHD-PRS, neurodevelopment measures, ADHD traits (ADHD-RS) and ADHD diagnosis at age 10. **Abbreviations:** OR: Odds Ratio. CI: Confidence Interval, N: sample size, PC: Principal Component, ASQ: Ages and Stages Questionnaire, TOF: Test Observation Form (Behavioural and emotional problems), Bayley Score (Cognitive functioning).

**eTable 6**: Associations between ASD-PRS, neurodevelopment measures, autistic traits (SRS-2) and autism diagnosis at age 10. **Abbreviations:** OR: Odds Ratio. CI: Confidence Interval, N: sample size, PC: Principal Component, ASQ: Ages and Stages Questionnaire, TOF: Test Observation Form (Behavioural and emotional problems), Bayley Score (Cognitive functioning).

**
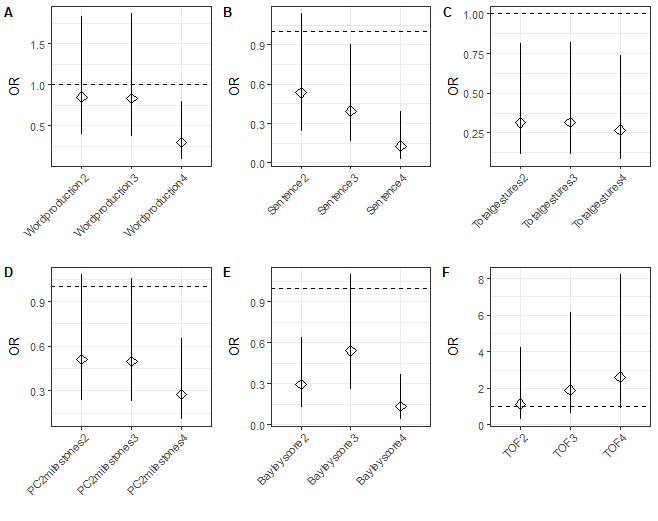
**

**eFigure 1**: Results from logistic regression analysis between neurodevelopmental measures across quartiles going from low (left) to high score (right) and their associations to ADHD diagnosis. Adjusted for confounders. A) word production at 2 years. B) length of longest sentence at 2 years. C) total gestures at 1 year. D) PC2 milestones. E) Bayley Score (Cognitive functioning). F) TOF: Test Observation Form (Behavioural and emotional problems).

**eMethods**

*TOF validation.* This questionnaire is composed of four empirically based subscales reflecting problems regarding withdrawn/depressed, language/thought problems, anxious, oppositional and attentional problems, two DSM oriented scales reflecting inattention and impulsivity-hyperactivity traits, two general broad scales reflecting internalizing and externalizing dimensions, and a total problems score6,17.

To test the psychometric properties of the Danish translation we applied a Cronbach alpha coefficient18 to measure all items internal consistency. Cronbach alpha >0.70 are considered as optimal consistency19. Results of the Cronbach alpha analysis on all items showed a coefficient of 0.96.

**REFERENCES**

1. Frankenburg W, Dodds J. *The Denver Developmental Assessment (Denver II)*. University of Colorado Medical School; 1990.

2. Wijnhoven TM, de Onis M, Onyango AW, et al. Assessment of gross motor development in the WHO Multicentre Growth Reference Study. *Food Nutr Bull*. 2004;25(1 Suppl):S37-45.

3. Bjarnadóttir E, Stokholm J, Chawes B, et al. Determinants of neurodevelopment in early childhood – results from the Copenhagen prospective studies on asthma in childhood (COPSAC2010) mother–child cohort. *Acta Paediatr*. 2019;108(9):1632-1641. doi:10.1111/apa.14753

4. Bleses D, Vach W, Slott M, et al. The Danish Communicative Developmental Inventories: validity and main developmental trends. *J Child Lang*. 2008;35(3):651-669. doi:10.1017/S0305000907008574

5. Bayley, N. *Bayley Scales of Infant and Toddler Development (Third Edition),Administration Manual.* Harcourt Assessment.; 2006.

6. McConaughy S, Achenbach T. *Manual for the Test Observation Form for Ages 2-18.* Center for Children, Youth & Families; 2004.

7. Singh A, Yeh CJ, Boone Blanchard S. Ages and Stages Questionnaire: a global screening scale. *Bol Med Hosp Infant Mex*. 2017;74(1):5-12. doi:10.1016/j.bmhimx.2016.07.008

8. Kaufman J, Birmaher B, Brent D, et al. Schedule for Affective Disorders and Schizophrenia for School-Age Children-Present and Lifetime Version (K-SADS-PL): initial reliability and validity data. *J Am Acad Child Adolesc Psychiatry*. 1997;36(7):980-988. doi:10.1097/00004583-199707000-00021

9. Mohammadzadeh P, Rosenberg JB, Vinding R, et al. Effects of prenatal nutrient supplementation and early life exposures on neurodevelopment at age 10: a randomised controlled trial - the COPSYCH study protocol. *BMJ Open*. 2022;12(2):e047706. doi:10.1136/bmjopen-2020-047706

10. World Health Organization. *The ICD-10 Classification of Mental and Behavioural Disorders : Diagnostic Criteria for Research*. World Health Organization; 1993. Accessed May 11, 2023. https://apps.who.int/iris/handle/10665/37108

11. Makransky G, Bilenberg N. Psychometric properties of the parent and teacher ADHD Rating Scale (ADHD-RS): measurement invariance across gender, age, and informant. *Assessment*. 2014;21(6):694-705. doi:10.1177/1073191114535242

12. Bruni TP. Test Review: Social Responsiveness Scale–Second Edition (SRS-2). *J Psychoeduc Assess*. 2014;32(4):365-369. doi:10.1177/0734282913517525

13. Demontis D, Walters GB, Athanasiadis G, et al. Genome-wide analyses of ADHD identify 27 risk loci, refine the genetic architecture and implicate several cognitive domains. *Nat Genet*. 2023;55(2):198-208. doi:10.1038/s41588-022-01285-8

14. Grove J, Ripke S, Als TD, et al. Identification of common genetic risk variants for autism spectrum disorder. *Nat Genet*. 2019;51(3):431-444. doi:10.1038/s41588-019-0344-8

15. Ge T, Chen CY, Ni Y, Feng YCA, Smoller JW. Polygenic prediction via Bayesian regression and continuous shrinkage priors. *Nat Commun*. 2019;10(1):1776. doi:10.1038/s41467-019-09718-5

16. Purcell S, Neale B, Todd-Brown K, et al. PLINK: A Tool Set for Whole-Genome Association and Population-Based Linkage Analyses. *Am J Hum Genet*. 2007;81(3):559-575. doi:10.1086/519795

17. Hernández-Lorca M, Sevelsted A, Jepsen JRM, et al. COVID-19 lockdown, genetic ADHD susceptibility, and mental health in 10- year-old children. *Psychiatry Res*. 2023;329:115481. doi:10.1016/j.psychres.2023.115481

18. The Use of Cronbach’s Alpha When Developing and Reporting Research Instruments in Science Education | Research in Science Education. Accessed June 11, 2025. https://link.springer.com/article/10.1007/s11165-016-9602-2

19. Tavakol M, Dennick R. Making sense of Cronbach’s alpha. *Int J Med Educ*. 2011;2:53-55. doi:10.5116/ijme.4dfb.8dfd
